# Supplementary material for: Nanohybrid polymer brushes on silica for bioseparation
Source: Royal Society of Chemistry journal article supplement (doi:10.1039/c6tb00241b), 2016-01-01
Supplement: c6tb00241b1.pdf [file c6tb00241b1.pdf]

## Electronic Supplementary Information

### Nanohybrid polymer brushes on silica for bioseparation

Lingdong Jiang,<sup>a</sup> Hector Bagan Navarro,<sup>a</sup> Tripta Kamra,<sup>a,b</sup> Tongchang Zhou<sup>a</sup> and Lei Ye<sup>\*a</sup>

<sup>a</sup> Division of Pure & Applied Biochemistry, Department of Chemistry, Lund University, Box 124,  
221 00 Lund, Sweden

<sup>b</sup> Division of Synchrotron Radiation Research, Department of Physics, Lund University, Box 118,  
221 00 Lund, Sweden

\* Corresponding author:

Lei Ye, Tel. +46 46 2229560; Fax +46 46 2224611; Email: Lei.Ye@tbiokem.lth.se

#### Detection of boronic acid on Si@poly(NIPAm-co-GMA)@APBA using ARS

Si@poly(NIPAm-co-GMA)@APBA (5 mg) was mixed with 2 mL of ARS solution (0.1 mM) prepared in PBS (20 mM, pH 6.8) and stirred for 5 min. The fluorescence emission of the mixture was measured using an excitation wavelength at 469 nm. For comparison, Si@poly(NIPAm-co-GMA)@alkyne was used as a control and tested in the same procedure. As shown in Fig. S1, Si@poly(NIPAm-co-GMA)@APBA exhibited a strong fluorescence after it was treated with ARS. For the control, Si@poly(NIPAm-co-GMA)@alkyne did not show the characteristic emission band at 600 nm. These results confirm the presence of boronic acids in Si@poly(NIPAm-co-GMA)@APBA particles.

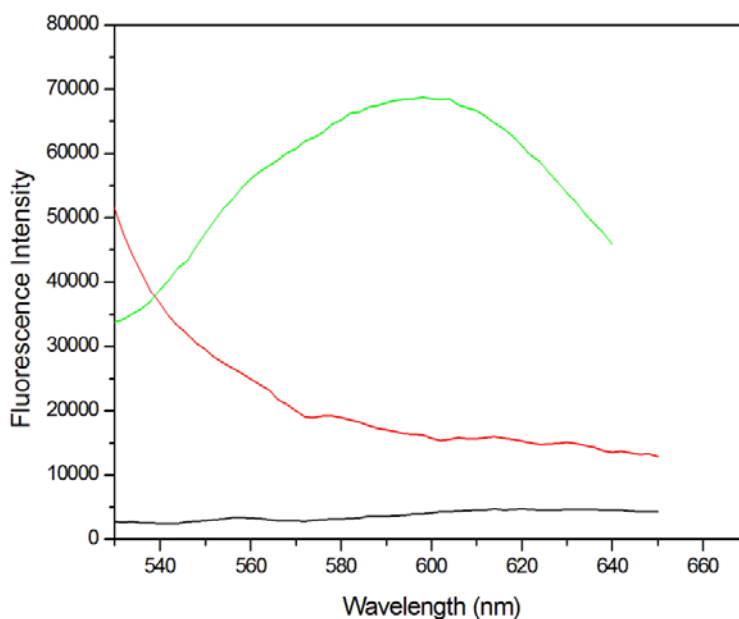

Fig. S1 Fluorescence emission spectra obtained from a mixture of: Si@poly(NIPAm-co-GMA)@APBA and ARS solution (green line); Si@poly(NIPAm-co-GMA)@alkyne and ARS solution (red line); and ARS solution (black line).
